# Supplementary material
Source: PubMed Central journal article supplement (PMC5682972)

## Supplementary Information

The periplasmic transaminase PtaA of *Pseudomonas fluorescens* converts the glutamic acid residue at the pyoverdine fluorophore to its  $\alpha$ -ketoglutaric acid form

**Michael T. Ringel<sup>1</sup>, Gerald Dräger<sup>2</sup>, and Thomas Brüser<sup>1,3</sup>**

From the <sup>1</sup>Institute of Microbiology, Leibniz Universität Hannover, Herrenhäuser Str. 2, 30419 Hannover, Germany, the <sup>2</sup>Institute of Organic Chemistry, Leibniz Universität Hannover, Schneiderberg 1 B, 30167 Hannover, Germany

Figure S1: UPLC-MS chromatograms filtered for identified compound masses.

Figure S2: Distribution of PtaA homologs.

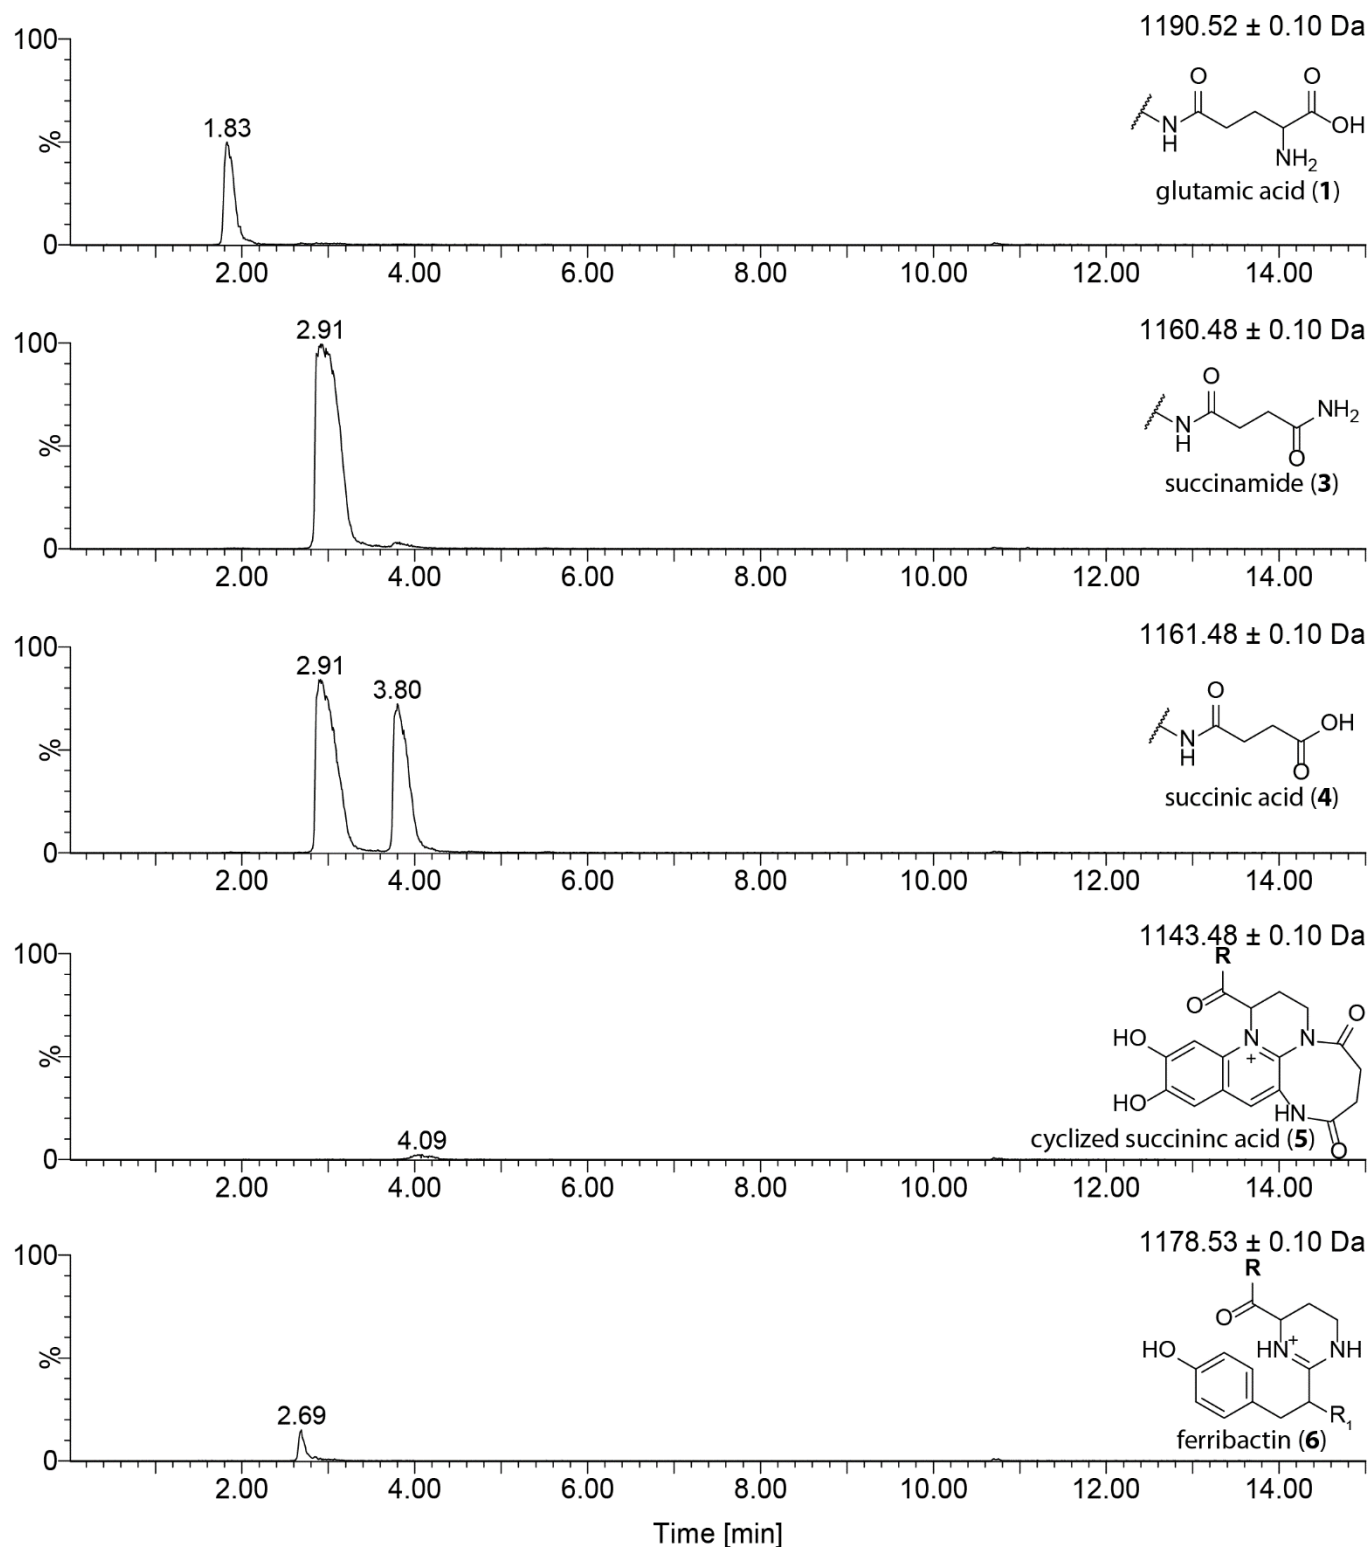

**Figure S1: UPLC-MS chromatograms filtered for identified compound masses.** The identified compounds (1) and (3)-(6) could be separated employing a shallower gradient for separation. The Peak at 2.91 min in the chromatogram of compound (4) is due to superposition of the isotope-peak of compound (3). The data indicates, that all identified compounds are genuine and not artifacts of MS.

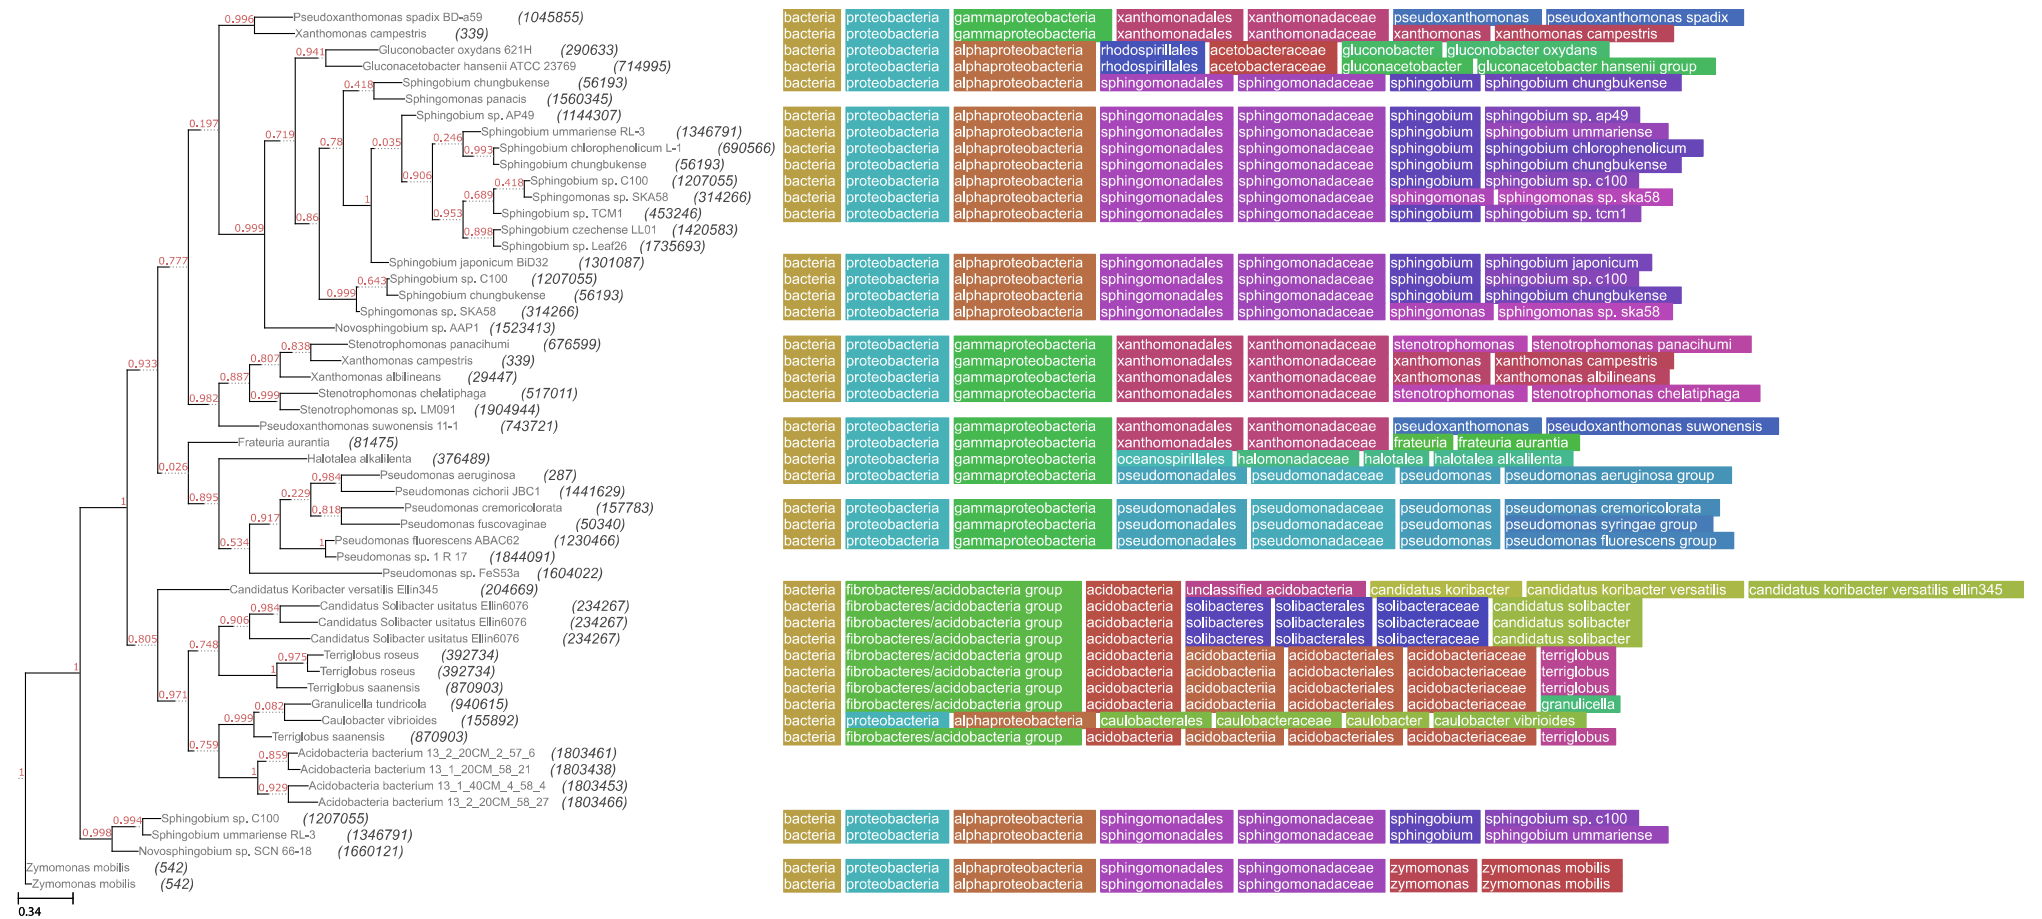

Supplement: 10.1074_M117.812545_jbc.M117.812545-1.pdf [file 10.1074_M117.812545_jbc.M117.812545-1.pdf]
